# Supplementary material for: Intranasal Dexmedetomidine for the Treatment of Pre-operative Anxiety and Insomnia: A Prospective, Randomized, Controlled, and Clinical Trial
Source: Front Psychiatry. 2022 May 30;13:816893. doi: 10.3389/fpsyt.2022.816893 (PMC9197108; doi:10.3389/fpsyt.2022.816893)
Supplement: Supplementary file 2 [file Data_Sheet_1.XLSX]

## Sheet: Sheet1
Group	Random number	Gender	Age	Height（cm)	Weight(Kg)	BMI	standard body weight(Kg)	ASA	Fall asleep time(min)	total sleep time(min)	ISI	ISI after treatment	HAMA	Satisfaction	T0 systolic pressure	T0 diastolic pressure	T0MAP	T0HR	T0SPO2	T1 systolic pressure	T1 diastolic pressure	T1MAP	T1HR	T1SPO2	T2 systolic pressure	T2 diastolic pressure	T2MAP	T2HR	T2SPO2	T3 systolic pressure	T3 diastolic pressure	T3MAP	T3HR	T3SPO2	T4 systolic pressure	T4 diastolic pressure	T4MAP	T4HR	T4SPO2	T5 systolic pressure	T5 diastolic pressure	T5MAP	T5HR	T5SPO2	T0NI	T1NI	T2NI	T3NI	T4NI
1	50	1	45	170	72.5	25.0865	63	1	24	380	10	5	16	8	127	69	88.3333	62	98	120	67	84.6667	50	98	108	62	77.3333	46	98	107	60	75.6667	48	98	110	60	76.6667	46	98	108	57	74	50	98	98	99	98	35	32
1	28	1	36	168	59	20.9042	61.6	1	20	429	11	5	14	9	118	76	90	82	98	110	65	80	70	98	105	68	80.3333	58	97	107	52	70.3333	52	98	100	58	72	52	98	105	64	77.6667	52	97	99	99	52	29	27
1	19	1	45	175	75	24.4898	66.5	2	35	354	26	7	22	9	127	75	92.3333	85	97	112	80	90.6667	72	98	107	64	78.3333	62	97	109	63	78.3333	58	97	105	60	75	57	97	110	61	77.3333	57	97	97	98	98	99	34
1	57	1	28	172	75	25.3515	64.4	1	20	440	12	5	12	8	127	78	94.3333	64	97	120	75	90	61	98	116	78	90.6667	48	97	108	76	86.6667	44	97	104	67	79.3333	46	97	108	70	82.6667	52	97	98	99	45	32	36
1	12	1	54	159	51	20.1733	55.3	2	16	396	14	6	14	7	125	85	98.3333	78	99	116	78	90.6667	76	99	129	77	94.3333	79	99	117	73	87.6667	68	97	120	66	84	66	97	128	64	85.3333	71	97	98	99	36	32	28
1	16	1	32	175	65	21.2245	66.5	1	21	414	11	3	15	9	116	72	86.6667	62	97	114	68	83.3333	60	97	116	69	84.6667	55	95	110	61	77.3333	52	97	108	66	80	53	96	107	56	73	52	95	99	99	98	32	28
1	18	1	48	175	70	22.8571	66.5	1	18	428	12	4	14	9	125	78	93.6667	66	97	119	64	82.3333	65	97	118	54	75.3333	73	97	110	58	75.3333	70	96	104	50	68	69	96	110	62	78	65	97	99	98	42	32	30
1	59	1	21	173	78	26.0617	65.1	1	27	389	12	8	12	8	119	70	86.3333	75	97	111	68	82.3333	58	97	103	62	75.6667	54	95	107	56	73	52	95	107	66	79.6667	53	96	105	61	75.6667	50	99	97	99	98	41	32
1	48	1	53	165	58	21.3039	59.5	1	18	451	14	4	10	9	126	83	97.3333	73	99	116	78	90.6667	76	99	117	73	87.6667	68	97	128	64	85.3333	71	97	119	70	86.3333	65	98	118	71	86.6667	62	97	99	98	41	35	42
1	60	1	42	165	62.5	22.9568	59.5	1	21	418	17	6	12	6	124	75	91.3333	83	97	118	70	86	80	97	108	65	79.3333	64	97	114	77	89.3333	68	97	108	63	78	62	97	110	63	78.6667	64	98	99	98	98	26	29
1	1	1	29	170	57	19.7232	63	1	14	385	11	3	12	8	123	62	82.3333	68	97	118	58	78	66	97	114	59	77.3333	65	96	108	58	74.6667	64	96	104	58	73.3333	70	96	108	60	76	60	97	98	98	35	42	35
1	62	1	58	182	69	20.8308	71.4	2	20	416	10	7	13	7	109	71	83.6667	64	95	104	67	79.3333	62	94	108	66	80	62	96	98	59	72	59	98	94	57	69.3333	56	97	99	57	71	56	96	99	97	42	36	36
1	24	1	26	165	60	22.0386	59.5	1	19	432	14	3	18	7	143	77	99	87	98	128	77	94	67	95	126	68	87.3333	52	98	119	64	82.3333	54	98	112	64	80	55	98	124	60	81.3333	56	97	99	98	39	32	34
1	23	1	44	172	74	25.0135	64.4	1	23	358	16	5	22	9	110	65	80	70	97	112	63	79.3333	62	97	108	60	76	50	97	108	58	74.6667	46	97	105	58	73.6667	48	98	108	58	74.6667	50	98	97	98	99	31	34
1	25	1	30	166	67	24.3141	60.2	1	18	417	12	4	15	8	124	72	89.3333	62	99	111	65	80.3333	58	98	105	67	79.6667	48	98	94	58	70	45	98	100	56	70.6667	45	98	104	58	73.3333	48	96	98	99	32	32	52
1	32	2	28	155	45	18.7305	51	1	28	369	12	2	14	9	114	68	83.3333	82	100	107	66	79.6667	80	100	103	61	75	71	98	107	56	73	67	98	110	61	77.3333	65	95	108	66	80	65	98	99	97	98	51	35
1	6	2	41	162	51	19.433	55.2	2	21	424	15	3	12	9	120	70	86.6667	70	98	110	62	78	63	98	105	58	73.6667	63	98	102	53	69.3333	58	97	98	62	74	57	98	100	61	74	60	97	97	98	99	34	33
1	10	2	24	162	52	19.8141	55.2	1	23	410	10	1	15	8	110	72	84.6667	72	98	112	58	76	57	98	107	50	69	52	97	98	62	74	50	97	98	60	72.6667	53	97	100	54	69.3333	52	98	98	99	98	31	33
1	55	2	55	160	59	23.0469	54	2	21	387	12	6	12	9	132	84	100	76	97	120	70	86.6667	66	96	115	70	85	65	96	109	65	79.6667	64	96	112	69	83.3333	64	97	107	67	80.3333	62	96	97	99	97	33	33
1	56	2	42	155	60	24.974	51	2	27	402	14	4	14	9	124	69	87.3333	87	97	127	60	82.3333	86	98	120	61	80.6667	72	97	110	65	80	67	97	105	62	76.3333	54	97	110	57	74.6667	57	97	99	98	98	29	43
1	67	2	23	170	60	20.7612	60	1	23	386	13	4	15	8	120	83	95.3333	83	98	110	69	82.6667	80	98	107	65	79	58	97	100	70	80	58	98	102	68	79.3333	60	98	100	62	74.6667	55	98	98	97	98	32	34
1	35	2	53	163	62	23.3355	55.8	1	20	408	10	5	12	8	112	70	84	72	97	110	65	80	59	96	102	60	74	48	97	107	58	74.3333	46	99	104	59	74	46	97	102	70	80.6667	51	97	99	98	28	35	32
1	42	2	52	160	51	19.9219	54	1	24	394	11	4	13	7	122	84	96.6667	70	98	115	75	88.3333	59	96	110	74	86	50	97	105	70	81.6667	52	97	102	68	79.3333	49	97	105	70	81.6667	52	97	97	97	97	31	35
1	22	2	42	166	59	21.4109	57.6	1	19	411	24	5	16	8	121	72	88.3333	81	97	116	70	85.3333	62	97	109	65	79.6667	54	97	111	70	83.6667	52	98	106	62	76.6667	49	97	107	69	81.6667	52	97	98	98	41	30	34
1	66	2	29	161	50.5	19.4823	54.6	1	26	368	17	2	10	8	127	84	98.3333	65	99	112	73	86	64	99	107	69	81.6667	56	97	108	67	80.6667	61	99	93	62	72.3333	55	97	102	67	78.6667	52	96	99	99	99	32	31
1	29	2	27	168	61	21.6128	58.8	1	21	375	22	5	12	9	104	63	76.6667	75	97	98	56	70	58	97	92	51	64.6667	50	97	94	62	72.6667	47	98	85	52	63	45	97	97	56	69.6667	52	97	99	97	99	33	34
1	44	2	45	159	58	22.9421	53.4	1	21	405	15	4	12	8	128	73	91.3333	76	99	110	68	82	62	99	111	65	80.3333	62	99	106	66	79.3333	59	99	106	55	72	53	99	103	66	78.3333	72	97	97	98	98	32	39
1	65	2	28	158	60	24.0346	52.8	1	18	348	10	2	14	7	109	78	88.3333	78	98	101	59	73	64	97	101	61	74.3333	57	96	88	57	67.3333	55	97	97	52	67	54	97	100	60	73.3333	52	97	98	99	34	32	36
1	14	2	37	158	57	22.8329	52.8	1	26	388	10	4	13	8	134	84	100.667	65	99	118	73	88	69	99	112	69	83.3333	56	97	108	62	77.3333	52	99	99	62	74.3333	52	97	102	67	78.6667	52	97	99	98	98	34	36
1	30	2	51	158	64	25.6369	52.8	2	24	475	11	2	12	9	118	65	82.6667	80	99	121	86	97.6667	65	98	107	57	73.6667	62	97	104	58	73.3333	61	98	107	59	75	62	97	111	60	77	63	97	97	98	99	31	45
1	43	2	53	158	58	23.2335	52.8	1	23	435	19	3	15	6	135	70	91.6667	98	97	120	70	86.6667	75	98	115	66	82.3333	68	97	108	61	76.6667	60	97	112	70	84	62	97	104	65	78	56	98	97	98	99	34	45
1	68	2	42	155	48	19.9792	51	1	19	384	8	5	10	9	102	67	78.6667	66	100	100	63	75.3333	63	100	90	58	68.6667	62	99	92	60	70.6667	57	99	86	55	65.3333	53	99	90	55	66.6667	54	99	98	99	48	31	34
1	31	2	20	155	50	20.8117	51	1	26	395	9	1	12	8	102	70	80.6667	66	96	98	64	75.3333	59	95	92	60	70.6667	70	96	94	59	70.6667	56	95	89	56	67	56	95	89	51	63.6667	56	95	99	98	97	32	34
1	51	2	38	159	53	20.9644	53.4	1	25	351	18	4	24	8	115	75	88.3333	84	98	118	74	88.6667	74	98	110	65	80	69	98	105	63	77	62	98	105	60	75	60	98	110	54	72.6667	59	98	99	99	98	34	51
1	9	2	32	160	55	21.4844	54	1	24	384	14	6	18	9	119	73	88.3333	82	98	114	65	81.3333	80	97	108	65	79.3333	72	98	105	62	76.3333	65	96	100	58	72	65	97	98	54	68.6667	68	98	99	99	98	32	36
1	61	2	19	166	53	19.2336	57.6	1	22	396	11	2	12	8	109	73	85	72	97	116	65	82	75	98	101	59	73	59	97	97	52	67	62	98	100	60	73.3333	54	98	100	60	73.3333	54	99	97	98	98	34	29
2	15	1	40	165	60	22.0386	59.5	1	140	228	15	16	13	5	122	77	92	75	97	122	82	95.3333	74	98	116	77	90	70	98	109	69	82.3333	73	98	119	82	94.3333	68	98	123	80	94.3333	78	98	97	99	99	98	92
2	38	1	42	160	58	22.6562	56	1	69	374	9	12	12	6	125	69	87.6667	80	97	128	70	89.3333	83	97	112	73	86	72	97	125	69	87.6667	72	97	116	63	80.6667	67	97	105	57	73	64	97	99	98	98	97	95
2	33	1	57	170	60	20.7612	63	1	29	398	8	12	12	7	111	70	83.6667	69	97	109	71	83.6667	62	97	113	74	87	57	98	104	64	77.3333	49	97	104	64	77.3333	46	98	102	69	80	44	97	98	99	98	46	37
2	39	1	56	168	62	21.9671	61.6	2	75	256	9	11	12	5	129	60	83	75	97	132	59	83.3333	78	97	119	59	79	74	96	112	61	78	69	97	109	51	70.3333	67	97	108	61	76.6667	75	97	98	99	98	98	97
2	4	1	37	179	71	22.1591	69.3	1	52	224	17	15	12	2	109	71	83.6667	69	97	104	68	80	61	98	111	70	83.6667	58	97	104	64	77.3333	49	98	102	69	80	44	98	113	80	91	57	98	97	99	99	98	34
2	3	1	31	178	70	22.0932	68.6	2	56	348	10	11	13	4	129	68	88.3333	71	98	120	70	86.6667	65	97	115	57	76.3333	65	98	124	63	83.3333	61	99	116	52	73.3333	57	98	112	56	74.6667	57	98	98	98	98	97	51
2	52	1	39	175	65	21.2245	66.5	2	195	290	25	24	13	2	135	70	91.6667	62	97	135	70	91.6667	62	97	132	67	88.6667	63	97	136	79	98	61	97	140	76	97.3333	57	95	128	71	90	54	97	98	99	99	95	98
2	69	1	32	176	66	21.3068	67.2	1	72	218	14	16	13	3	111	73	85.6667	62	98	103	66	78.3333	56	96	100	66	77.3333	52	96	97	65	75.6667	60	96	109	71	83.6667	56	96	98	67	77.3333	48	98	97	99	98	98	97
2	26	1	43	170	73	25.2595	63	2	68	390	10	12	11	5	130	72	91.3333	95	98	126	69	88	95	98	120	68	85.3333	98	96	123	65	84.3333	101	96	106	60	75.3333	88	98	97	53	67.6667	64	100	98	99	99	94	98
2	11	1	22	180	85	26.2346	70	2	56	328	9	9	12	4	149	68	95	71	100	140	70	93.3333	65	100	135	57	83	65	100	134	63	86.6667	61	100	116	52	73.3333	57	98	121	61	81	56	98	99	99	97	98	34
2	49	1	26	172	70	23.6614	64.4	1	45	335	10	8	13	6	127	70	89	69	98	121	62	81.6667	58	97	120	68	85.3333	52	97	130	70	90	48	97	113	65	81	52	97	108	67	80.6667	52	97	98	98	98	98	32
2	71	1	20	170	74	25.6055	63	1	89	367	13	13	18	4	124	82	96	78	99	121	77	91.6667	88	96	124	82	96	82	98	136	97	110	96	98	122	81	94.6667	88	98	119	65	83	72	98	97	99	99	98	98
2	5	1	29	175	59	19.2653	66.5	1	130	303	15	17	24	2	116	61	79.3333	85	97	122	65	84	90	98	120	65	83.3333	87	99	130	62	84.6667	85	99	125	60	81.6667	82	98	116	63	80.6667	80	98	99	98	98	97	98
2	63	1	44	168	60	21.2585	61.6	1	78	298	15	15	19	2	119	75	89.6667	64	98	108	68	81.3333	58	97	115	72	86.3333	58	96	107	70	82.3333	56	97	105	68	80.3333	60	99	100	66	77.3333	58	97	99	99	99	96	98
2	13	2	50	162	51	19.433	55.2	1	168	169	18	24	12	1	116	63	80.6667	61	99	120	68	85.3333	57	98	114	63	80	61	97	119	60	79.6667	63	97	111	73	85.6667	59	98	113	54	73.6667	57	98	99	98	98	98	97
2	20	2	50	154	54	22.7694	50.4	1	57	246	18	12	13	5	122	61	81.3333	95	97	118	63	81.3333	82	98	114	64	80.6667	88	97	118	63	81.3333	72	96	109	70	83	65	98	111	65	80.3333	62	97	98	97	97	99	56
2	58	2	28	160	51	19.9219	54	1	138	238	10	15	14	2	104	52	69.3333	106	98	96	50	65.3333	82	99	94	49	64	78	98	100	55	70	77	98	95	52	66.3333	76	99	100	54	69.3333	72	97	99	98	99	95	98
2	7	2	43	165	63	23.1405	57	2	24	320	10	6	12	3	129	79	95.6667	69	99	133	79	97	70	98	122	74	90	65	97	118	68	84.6667	62	99	120	68	85.3333	59	98	111	64	79.6667	60	97	98	99	98	35	42
2	45	2	54	157	58	23.5304	52.2	2	108	279	12	14	15	4	130	68	88.6667	81	99	123	61	81.6667	74	98	135	67	89.6667	75	98	134	63	86.6667	71	97	124	63	83.3333	65	97	116	52	73.3333	57	98	98	99	98	98	99
2	54	2	45	160	61	23.8281	54	1	99	315	13	17	13	2	126	92	103.333	88	98	125	87	99.6667	83	97	138	95	109.333	81	97	126	91	102.667	78	97	124	91	102	82	97	138	95	109.333	81	97	97	97	99	97	98
2	70	2	44	157	63.5	25.7617	52.2	1	195	180	17	21	16	2	119	70	86.3333	79	98	125	72	89.6667	75	98	115	70	85	78	98	115	65	81.6667	72	97	117	58	77.6667	69	98	122	70	87.3333	78	99	98	98	98	98	98
2	47	2	34	168	63	22.3214	58.8	1	45	392	12	9	14	6	121	62	81.6667	78	96	114	59	77.3333	71	97	116	62	80	67	96	102	56	71.3333	62	97	96	51	66	57	96	87	51	63	49	97	99	98	98	99	31
2	72	2	46	160	51	19.9219	54	2	49	328	18	14	15	5	141	79	99.6667	82	98	136	78	97.3333	78	97	128	77	94	72	98	126	81	96	67	97	128	77	94	65	98	125	72	89.6667	66	98	98	99	99	98	34
2	46	2	44	159	55	21.7555	53.4	1	250	159	24	24	14	2	125	66	85.6667	72	100	122	68	86	68	98	115	68	83.6667	67	99	122	63	82.6667	60	98	105	59	74.3333	68	98	120	57	78	63	98	99	97	97	97	98
2	27	2	50	158	52	20.83	52.8	1	55	348	13	13	12	3	115	70	85	77	98	112	70	84	87	97	120	77	91.3333	81	97	116	73	87.3333	86	97	109	68	81.6667	62	98	111	62	78.3333	59	97	97	99	99	99	33
2	34	2	52	161	58	22.3757	54.6	1	39	419	10	7	12	7	116	63	80.6667	64	98	113	54	73.6667	57	98	119	60	79.6667	63	98	111	73	85.6667	59	98	107	77	87	52	98	112	78	89.3333	65	98	98	98	98	97	32
2	37	2	58	160	50	19.5312	54	1	49	367	12	8	15	5	120	70	86.6667	68	98	116	63	80.6667	62	98	120	70	86.6667	64	98	121	70	87	76	98	110	65	80	62	98	112	62	78.6667	62	97	98	99	98	99	34
2	8	2	38	159	58	22.9421	53.4	2	69	238	8	11	13	2	134	88	103.333	85	98	125	88	100.333	82	97	118	81	93.3333	83	97	110	78	88.6667	72	97	106	73	84	65	97	109	76	87	62	97	97	98	99	98	98
2	53	2	45	160	45	17.5781	54	1	100	158	24	22	14	2	122	61	81.3333	89	97	118	63	81.3333	94	98	120	63	82	82	97	118	67	84	75	97	125	69	87.6667	84	97	114	64	80.6667	72	97	99	97	98	99	98
2	64	2	52	160	67	26.1719	54	1	200	212	14	17	14	2	98	56	70	65	99	93	50	64.3333	63	99	99	55	69.6667	57	98	98	54	68.6667	55	99	101	55	70.3333	57	99	98	54	68.6667	52	97	98	99	99	97	98
2	21	2	39	164	63	23.4236	56.4	1	58	286	15	15	11	3	108	64	78.6667	87	97	105	64	77.6667	90	96	107	61	76.3333	91	97	110	62	78	94	98	102	62	75.3333	72	98	104	60	74.6667	69	97	98	98	97	99	42
2	17	2	42	149	53	23.8728	47.4	1	84	311	12	12	15	2	124	72	89.3333	79	97	114	72	86	72	97	115	76	89	69	97	116	73	87.3333	75	99	122	76	91.3333	75	98	107	76	86.3333	69	98	98	96	99	98	98
2	40	2	19	168	60	21.2585	58.8	1	72	295	10	12	12	3	121	75	90.3333	85	98	107	72	83.6667	87	98	145	98	113.667	95	98	121	70	87	97	100	106	82	90	83	99	108	57	74	70	98	99	97	98	99	98
2	36	2	21	162	60	22.8624	55.2	1	39	410	10	6	9	4	118	68	84.6667	62	98	124	60	81.3333	58	97	118	60	79.3333	56	99	110	60	76.6667	54	97	110	58	75.3333	52	97	105	58	73.6667	53	99	99	98	98	99	45
2	41	2	29	159	55	21.7555	53.4	1	58	348	12	12	14	2	106	72	83.3333	75	98	112	75	87.3333	78	97	105	70	81.6667	70	98	105	68	80.3333	65	99	100	52	68	60	98	100	50	66.6667	62	98	99	99	99	96	51
2	2	2	56	164	54	20.0773	56.4	1	105	252	15	14	13	2	134	84	100.667	85	96	140	85	103.333	82	98	132	75	94	86	97	130	70	90	84	98	132	75	94	80	97	128	70	89.3333	72	97	99	98	99	98	98
[truncated: 1 more columns]
